# Supplementary material for: Fabrication of Triple-parted Stomata-inspired Membrane with Stimulus-responsive Functions
Source: PubMed Central journal article supplement (PMC4757937; doi:10.1038/srep21258), 2016-02-18
Supplement: srep21258-s1.pdf [file srep21258-s1.pdf]

1 *Scientific report*

2 **Supplementary information**

3

4 **Fabrication of Triple-parted Stomata-inspired Membrane with Stimuli-**  
5 **responsive Functions**

6

7 Hyejeong Kim<sup>a</sup>, and Sang-Joon Lee<sup>a,\*</sup>

8 <sup>a</sup> Center for Biofluid and Biomimic Research, Department of Mechanical Engineering,  
9 Pohang University of Science and Technology (POSTECH), Pohang, 790-784, South Korea.

10

11 \* Corresponding author.

12 Tel.: +82 54 279 2169; Fax: +82 54 279 3199.

13 E-mail address: sjlee@postech.ac.kr (S.J. Lee)

14

15

16

# 1 Supplementary

2

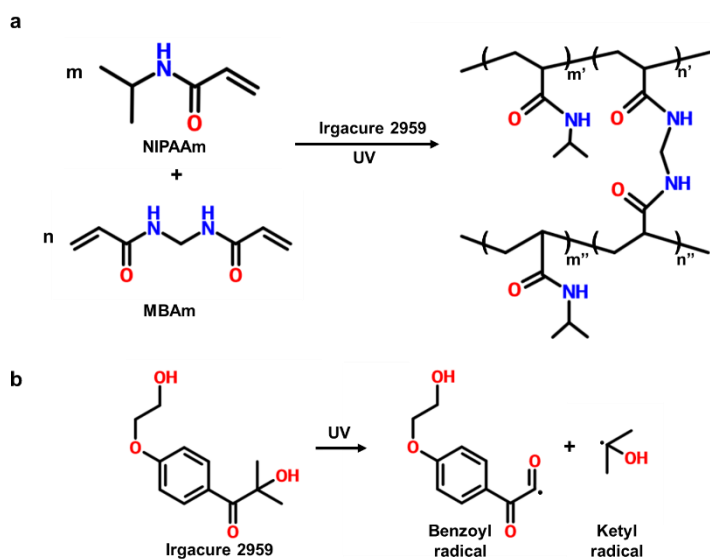

3

4

5 **Figure S1.** (a) Schematic of PNIPAAm hydrogel synthesized through free radical  
 6 copolymerization with MBAm as a crosslinking agent. (b) Schematic of free radical formation  
 7 with photoinitiator illumination.

8

9

| #      | NIPAAm              | Irgacure 2959     | MBAm                | CR (wt %) |
|--------|---------------------|-------------------|---------------------|-----------|
| CR 1   | 100 mg/ 500 $\mu$ l | 1 mg/ 100 $\mu$ l | 1 mg/ 100 $\mu$ l   | 0.143     |
| CR 1.5 |                     |                   | 1.5 mg/ 100 $\mu$ l | 0.214     |
| CR 2   |                     |                   | 2 mg/ 100 $\mu$ l   | 0.286     |
| CR 2.5 |                     |                   | 2.5 mg/ 100 $\mu$ l | 0.357     |
| CR 3   |                     |                   | 3 mg/ 100 $\mu$ l   | 0.429     |

10

11 **Table S1.** Chemical composition of five different pre-gel solutions. The pre-gel solutions  
 12 contain the same amount of monomers and photoinitiator but different crosslinker (MPAm)  
 13 contents.

14

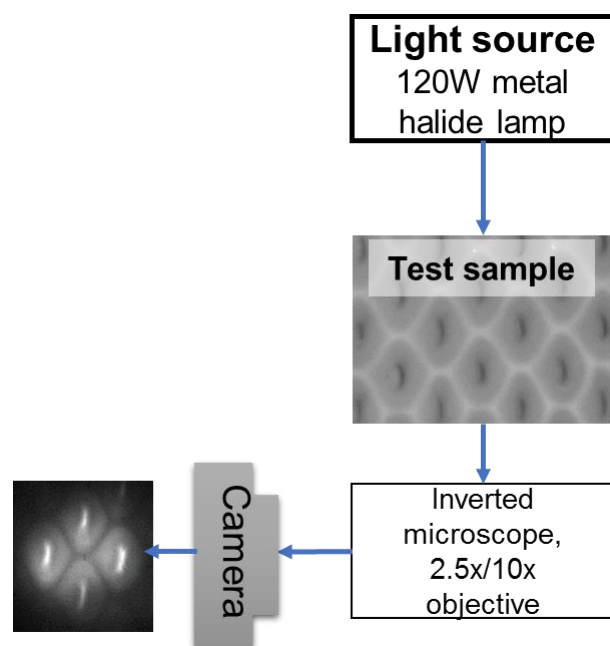

1  
2 **Figure S2.** Schematic of the experimental setup for light intensity measurement. Light from a  
3 120 W metal halide lamp is illuminated to the test samples. The light transmitted through the  
4 samples is detected by an inverted microscope equipped with a Photron APX camera.

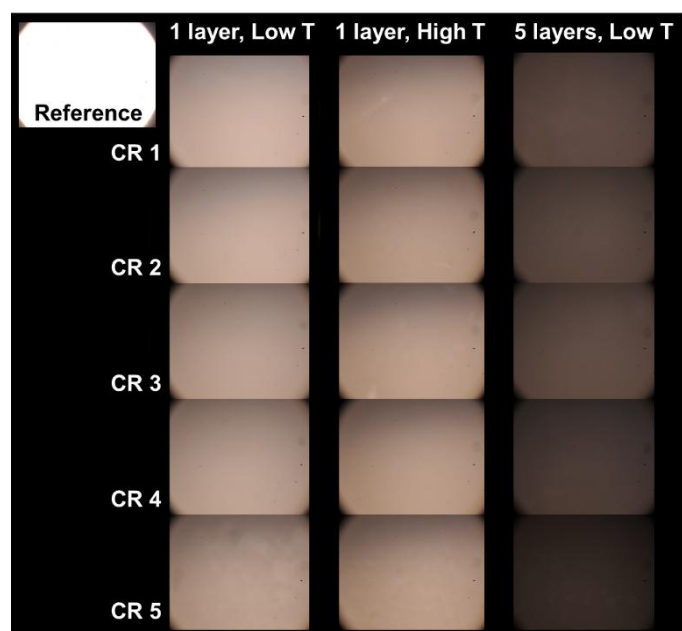

5  
6 **Figure S3.** Optical images of SIM fabricated with five different pre-gel solutions (CR 1–CR 3).  
7 The relative opacity of the membrane is evaluated from the light intensity transmitted through  
8 the membranes. The transmitted light intensity decreases with increasing crosslinking level and  
9 membrane thickness.
